# Supplementary material for: Selective oxidation of linear alcohols: the promotional effect of water and inhibiting effect of carboxylates over dilute PdAu catalysts
Source: Royal Society of Chemistry journal article supplement (doi:10.1039/d4ta01383b), 2024-01-01
Supplement: d4ta01383b1.pdf [file d4ta01383b1.pdf]

# Selective Oxidation of Linear Alcohols: The Promotional Effect of Water and Inhibiting Effect of Carboxylates over Dilute PdAu Catalysts

*Jennifer D. Lee,<sup>1,†,§,\*</sup> Amanda Filie,<sup>2,†</sup> Leigh Wilson,<sup>1</sup> Karin Nguyen,<sup>3</sup> Tanya Shirman,<sup>1,2</sup> Erjia Guan,<sup>4</sup> Mathilde Luneau,<sup>1</sup> Michael Aizenberg,<sup>2</sup> Joanna Aizenberg,<sup>1,2</sup> Robert J. Madix,<sup>2,‡</sup> Cynthia M. Friend<sup>1,2,\*</sup>*

<sup>1</sup>Department of Chemistry and Chemical Biology, Harvard University, Cambridge, MA 02138, USA

<sup>2</sup>John A. Paulson School of Engineering and Applied Sciences, Harvard University, Cambridge, MA 02138, USA

<sup>3</sup>Department of Chemistry and Pharmacy, University of Freiburg, Freiburg, Germany

<sup>4</sup>Department of Materials Science and Chemical Engineering, Stony Brook University, Stony Brook, New York 11794, USA.

KEYWORDS: catalysis, bimetallic, dilute alloy, alcohol oxidation, surface poisoning, infrared spectroscopy, palladium, gold

## Supporting Information

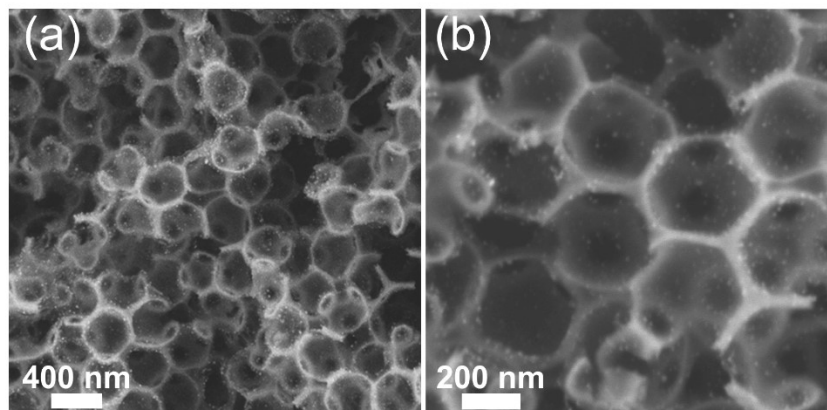

Figure S1. TEM images of Pd<sub>3</sub>Au<sub>97</sub> RCT-SiO<sub>2</sub> with (a) lower and (b) higher magnifications.

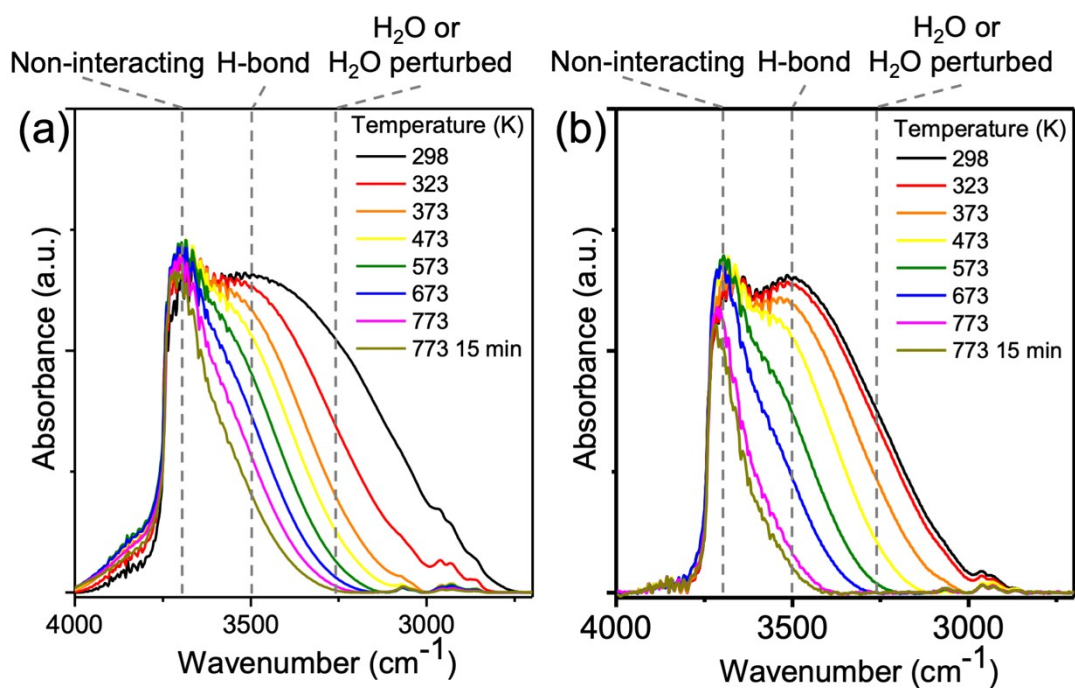

Figure S2. *In-situ* FTIR spectra of (a) RCT-SiO<sub>2</sub> and (b) as-prepared Pd<sub>3</sub>Au<sub>97</sub> RCT-SiO<sub>2</sub> in the 4000-2700 cm<sup>-1</sup> region collected as a function of temperature from 298 to 773 K in O<sub>2</sub>. Dashed lines denoted the assignments of silanol groups. Reaction conditions: 100% O<sub>2</sub>; flow rate = 20 mL/min.

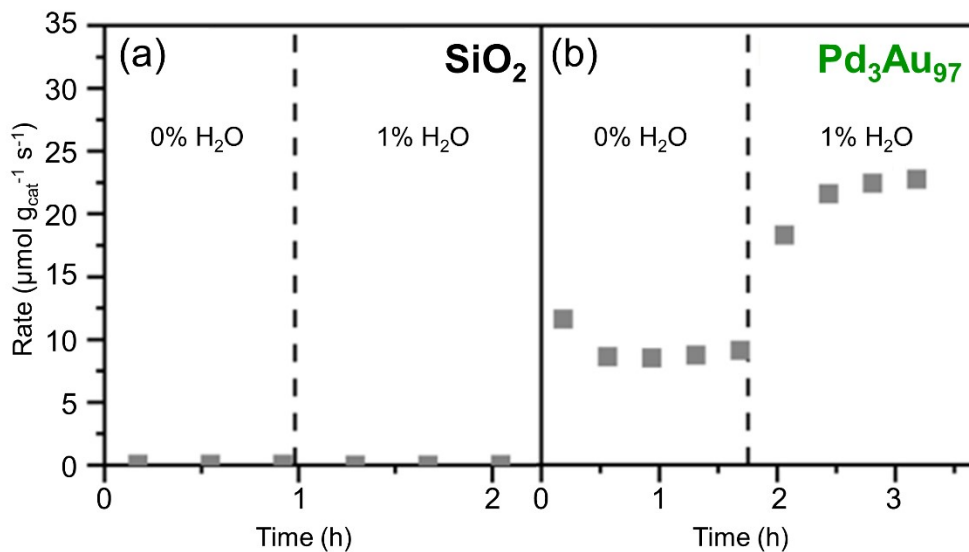

Figure S3. The rate of 1-propanol oxidation over (a) RCT-SiO<sub>2</sub>, and (b) Pd<sub>3</sub>Au<sub>97</sub>RCT-SiO<sub>2</sub> in the absence and presence of co-fed 1% H<sub>2</sub>O at 423 K. Reaction conditions: 4% 1-propanol, 10% O<sub>2</sub>, 0 or 1% H<sub>2</sub>O, balanced in He; total flow rate = 50 mL/min; m<sub>cat</sub> = 40.0 and 10.0 mg for RCT-SiO<sub>2</sub> and Pd<sub>3</sub>Au<sub>97</sub> RCT-SiO<sub>2</sub>, respectively.

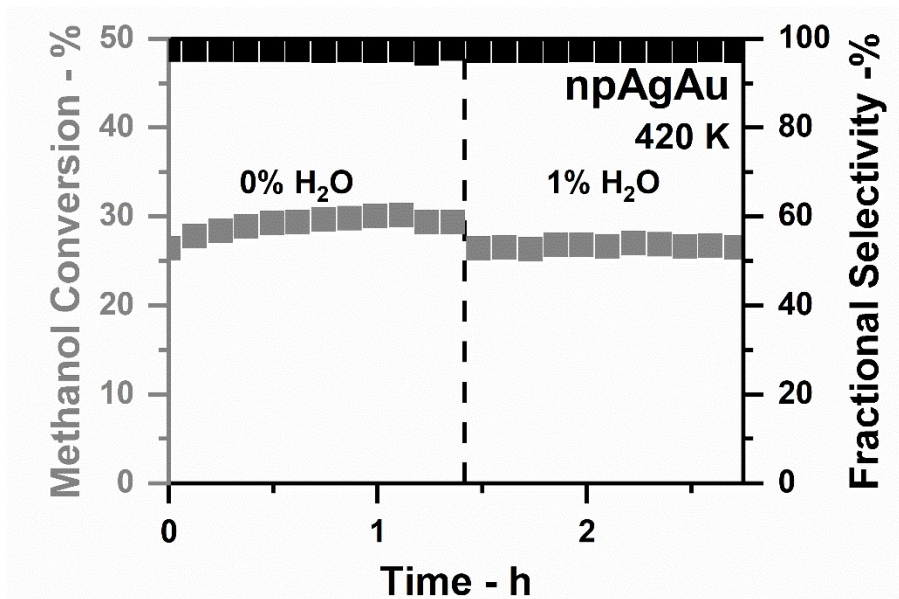

Figure S4. The conversion and selectivity for methanol oxidation reaction over nanoporous AgAu (npAgAu) in the absence and presence of co-fed 1% H<sub>2</sub>O at 423 K. Reaction conditions: 10% methanol, 10% O<sub>2</sub>, 0 or 1% H<sub>2</sub>O, balanced in He; total flow rate = 50 mL/min;  $m_{\text{cat}} = 18.0$  mg.

The Au nanoparticle-silica interface was essential to the observed activity of the Au RCT-SiO<sub>2</sub> catalyst for the oxidation of 1-propanol between 423 (Table S1) and 573 K (Table S2). The catalyst-mass normalized rate over the RCT-SiO<sub>2</sub> support for the oxidation of 1-propanol at 423 and 573 K, in the absence and presence of co-fed 1% H<sub>2</sub>O, was one order of magnitude smaller than that of either the Au or Pd<sub>3</sub>Au<sub>97</sub> RCT-SiO<sub>2</sub> catalyst. Although co-feeding 1% H<sub>2</sub>O with 1-propanol and O<sub>2</sub> (4% and 10%, respectively) over the Au and Pd<sub>3</sub>Au<sub>97</sub> RCT-SiO<sub>2</sub> catalysts only promoted conversion at 423 K, it is important to note that H<sub>2</sub>O is a byproduct in several reactions of the oxygen-assisted alcohol self-coupling mechanism over Au.<sup>1,2</sup> Consequently, as 1-propanol is catalyzed by Au in this catalytic cycle, H<sub>2</sub>O is generated *in-situ*. Because the FTIR results suggest hydroxyls on the silica remain present on the support up to temperatures as high as 773 K (Figure 1a) and H<sub>2</sub>O is generated in substantial quantities over the Pd<sub>3</sub>Au<sub>97</sub> RCT-SiO<sub>2</sub> catalysts in this temperature range, it is reasonable to assume sufficient water is present in the system at elevated temperatures and interacting with the silica support.

Table S1. The rate and selectivity of 1-propanol oxidation over Au RCT-SiO<sub>2</sub>, Pd<sub>3</sub>Au<sub>97</sub> RCT-SiO<sub>2</sub>, and support RCT-SiO<sub>2</sub> in the absence and presence of co-fed 1% H<sub>2</sub>O at 423 K. Reaction conditions: 4% 1-propanol, 10% O<sub>2</sub>, 0 or 1% H<sub>2</sub>O, balanced in He; total flow rate = 50 mL/min; m<sub>cat</sub> = 10.0, 10.0, and 40.0 mg for Au RCT-SiO<sub>2</sub>, Pd<sub>3</sub>Au<sub>97</sub> RCT-SiO<sub>2</sub>, and RCT-SiO<sub>2</sub>, respectively.

| Catalyst                         | H <sub>2</sub> O co-fed (%) | Rate (μmol g <sub>cat</sub> <sup>-1</sup> s <sup>-1</sup> ) | Conversion (%) | Propanal | Selectivity (%)   |                 |                         |
|----------------------------------|-----------------------------|-------------------------------------------------------------|----------------|----------|-------------------|-----------------|-------------------------|
|                                  |                             |                                                             |                |          | Propyl propionate | CO <sub>2</sub> | Alkene +CO <sub>2</sub> |
| Au                               | 0                           | 4.4 ± 0.3                                                   | 3.2 ± 0.3      | 100.0    | 0.0               | 0.0             | 0.0                     |
|                                  | 1                           | 20.1 ± 0.8                                                  | 14.7 ± 0.6     | 83.9     | 16.1              | 0.0             | 0.0                     |
| Pd <sub>3</sub> Au <sub>97</sub> | 0                           | 8.8 ± 0.3                                                   | 6.4 ± 0.2      | 89.5     | 8.4               | 0.9             | 1.3                     |
|                                  | 1                           | 22.3 ± 0.7                                                  | 16.3 ± 0.5     | 82.5     | 15.9              | 0.3             | 1.3                     |
| RCT-SiO <sub>2</sub>             | 0                           | 0.1 ± 0.1                                                   | 0.2 ± 0.1      | 100.0    | 0.0               | 0.0             | 0.0                     |
|                                  | 1                           | 0.0                                                         | 0.0            | 0.0      | 0.0               | 0.0             | 0.0                     |

Table S2. The rate of 1-propanol oxidation over Au RCT-SiO<sub>2</sub>, Pd<sub>3</sub>Au<sub>97</sub> RCT-SiO<sub>2</sub>, and support RCT-SiO<sub>2</sub> in the absence and presence of co-fed 1% H<sub>2</sub>O at 573 K. Reaction conditions: 4% 1-propanol, 10% O<sub>2</sub>, 0 or 1% H<sub>2</sub>O, balanced in He; total flow rate = 50 mL/min; m<sub>cat</sub> = 10.0, 10.0, and 40.0 mg for Au RCT-SiO<sub>2</sub>, Pd<sub>3</sub>Au<sub>97</sub> RCT-SiO<sub>2</sub>, and RCT-SiO<sub>2</sub>, respectively.

| Catalyst                         | H <sub>2</sub> O co-fed (%) | Rate of 1-propanol oxidation (μmol g <sub>cat</sub> <sup>-1</sup> s <sup>-1</sup> ) | Conversion of 1-propanol (%) |
|----------------------------------|-----------------------------|-------------------------------------------------------------------------------------|------------------------------|
| Au                               | 0                           | 95.6 ± 1.4                                                                          | 70.1 ± 1.0                   |
|                                  | 1                           | 93.4 ± 1.2                                                                          | 68.5 ± 0.8                   |
| Pd <sub>3</sub> Au <sub>97</sub> | 0                           | 110.2 ± 4.4                                                                         | 80.8 ± 3.2                   |
|                                  | 1                           | 110.1 ± 2.5                                                                         | 80.8 ± 1.8                   |
| RCT-SiO <sub>2</sub>             | 0                           | 2.9 ± 0.1                                                                           | 8.5 ± 0.4                    |
|                                  | 1                           | 1.9 ± 0.1                                                                           | 5.5 ± 0.1                    |

Table S3. The rate and selectivity of methanol oxidation over Au RCT-SiO<sub>2</sub>, Pd<sub>3</sub>Au<sub>97</sub> RCT-SiO<sub>2</sub>, and Pd RCT-SiO<sub>2</sub>. Reaction conditions: 10% methanol, 10% O<sub>2</sub>, balanced in He; total flow rate = 50 mL/min; m<sub>cat</sub> = 40.8, 40.5, and 10.0 mg for Au RCT-SiO<sub>2</sub>, Pd<sub>3</sub>Au<sub>97</sub> RCT-SiO<sub>2</sub>, and Pd RCT-SiO<sub>2</sub>, respectively.

| Catalyst                         | Reaction Temperature (K) | Rate (μmol g <sub>cat</sub> <sup>-1</sup> s <sup>-1</sup> ) | Conversion (%) | Selectivity (%) |                 |
|----------------------------------|--------------------------|-------------------------------------------------------------|----------------|-----------------|-----------------|
|                                  |                          |                                                             |                | Methyl formate  | CO <sub>2</sub> |
| Au                               | 423                      | 6.7                                                         | 8.0            | 97.1            | 2.9             |
| Pd <sub>3</sub> Au <sub>97</sub> | 423                      | 36.2                                                        | 42.7           | 89.9            | 10.1            |
| Pd*                              | 353                      | 96.0                                                        | 28.0           | 87.0            | 13.0            |

\*Note that Pd RCT-SiO<sub>2</sub> was first tested at 423 K but was highly exothermic and required the experiment to be shut down before data could be acquired. The data shown were acquired at 353 K instead; however, due to its exothermic behavior and instability under reaction conditions, sudden increases in CO<sub>2</sub> production were observed over time (“light-off” behavior) and a steady-state conversion was not achievable. The data reported does not consider the “light-off” behavior and instability of Pd RCT-SiO<sub>2</sub>.



Table S4. The reaction products of C1 to C4 alcohol oxidation at 423 K over Au and Pd<sub>3</sub>Au<sub>97</sub> RCT-SiO<sub>2</sub> (corresponding to Figure 2). The alkene products are only observed for Pd<sub>3</sub>Au<sub>97</sub> RCT-SiO<sub>2</sub> catalysts. Reaction conditions: 4% methanol or 1-propanol, balanced in He; total flow rate = 50 mL/min, m<sub>cat</sub> = 10.0 mg for both Au and Pd<sub>3</sub>Au<sub>97</sub> RCT-SiO<sub>2</sub>.

| Reactant   | Reaction Products                                                                                 |                 |                                                                                                          |                                                                                                    |
|------------|---------------------------------------------------------------------------------------------------|-----------------|----------------------------------------------------------------------------------------------------------|----------------------------------------------------------------------------------------------------|
|            | Aldehyde                                                                                          | Combustion      | Coupling                                                                                                 | Alkene                                                                                             |
| Methanol   | 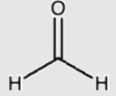<br>Formaldehyde | CO <sub>2</sub> | <br>Methyl Formate     | ND                                                                                                 |
| Ethanol    | <br>Acetaldehyde | CO <sub>2</sub> | <br>Ethyl Acetate      | ND                                                                                                 |
| 1-Propanol | <br>Propanal    | CO <sub>2</sub> | <br>Propyl Propionate | H <sub>2</sub> C=CH <sub>2</sub><br>Ethylene                                                       |
| 1-Butanol  | <br>Butanal    | CO <sub>2</sub> | <br>Butyl Butyrate   | <br>Propylene |

Table S5. The rate and selectivity of alcohol oxidation (C1-C4) over Au RCT-SiO<sub>2</sub> and Pd<sub>3</sub>Au<sub>97</sub> RCT-SiO<sub>2</sub> at 423 K. Reaction conditions: 4% alcohol, 10% O<sub>2</sub>, balanced in He; total flow rate = 50 mL/min; m<sub>cat</sub> = 40.0 and 40.5 mg for Au RCT-SiO<sub>2</sub> and Pd<sub>3</sub>Au<sub>97</sub> RCT-SiO<sub>2</sub>, respectively.

| Catalyst                         | Alcohol    | Rate<br>( $\mu\text{mol g}_{\text{cat}}^{-1}$<br>$\text{s}^{-1}$ ) | Conversion<br>(%) | Selectivity (%) |            |            |                            |
|----------------------------------|------------|--------------------------------------------------------------------|-------------------|-----------------|------------|------------|----------------------------|
|                                  |            |                                                                    |                   | Aldehyde        | Coupling   | Combustion | Alkene<br>+CO <sub>2</sub> |
| Au                               | Methanol   | 9.5 ± 0.1                                                          | 27.9 ± 0.3        | N/A             | 94.4 ± 1.0 | 5.6 ± 0.1  | N/A                        |
|                                  | Ethanol    | 5.0 ± 0.1                                                          | 14.8 ± 0.1        | 83.3 ± 0.1      | 16.7 ± 2.0 | N/A        | N/A                        |
|                                  | 1-Propanol | 9.6 ± 0.4                                                          | 28.1 ± 1.0        | 80.4 ± 4.0      | 19.6 ± 2.1 | N/A        | N/A                        |
|                                  | 1-Butanol  | 8.6 ± 0.2                                                          | 25.4 ± 0.5        | 100.0 ± 0.1     | N/A        | N/A        | N/A                        |
| Pd <sub>3</sub> Au <sub>97</sub> | Methanol   | 33.0 ± 0.1                                                         | 98.1 ± 0.2        | N/A             | 62.7 ± 0.8 | 37.3 ± 0.8 | N/A                        |
|                                  | Ethanol    | 6.2 ± 0.2                                                          | 18.4 ± 0.5        | 76.5 ± 1.0      | 21.1 ± 0.9 | 2.4 ± 0.1  | N/A                        |
|                                  | 1-Propanol | 9.1 ± 1.0                                                          | 27.0 ± 2.9        | 79.0 ± 1.5      | 17.9 ± 1.3 | 0.7 ± 0.1  | 2.3 ± 0.2                  |
|                                  | 1-Butanol  | 7.2 ± 0.3                                                          | 21.5 ± 0.8        | 93.2 ± 0.2      | N/A        | 0.3 ± 0.1  | 6.5 ± 0.1                  |

Table S6. The rate of methanol or 1-propanol conversion over Au and Pd<sub>3</sub>Au<sub>97</sub> RCT-SiO<sub>2</sub> catalysts under non-oxidative conditions. Reaction conditions: 4% methanol or 1-propanol, balanced in He; total flow rate = 50 mL;min, m<sub>cat</sub> = 10.0 mg for both Au and Pd<sub>3</sub>Au<sub>97</sub> RCT-SiO<sub>2</sub>.

| Catalyst                                              | Temperature (K) | Alcohol    | Rate ( $\mu\text{mol g}_{\text{cat}}^{-1} \text{s}^{-1}$ ) |
|-------------------------------------------------------|-----------------|------------|------------------------------------------------------------|
| Pd <sub>3</sub> Au <sub>97</sub> RCT-SiO <sub>2</sub> | 423             | Methanol   | 0.4±0.1                                                    |
|                                                       | 423             | 1-Propanol | 0.3±0.1                                                    |
|                                                       | 573             | Methanol   | 1.7±0.6                                                    |
|                                                       | 573             | 1-Propanol | 3.5±0.7                                                    |
| Au RCT-SiO <sub>2</sub>                               | 423             | Methanol   | 0.2±0.2                                                    |
|                                                       | 423             | 1-Propanol | 0.4±0.1                                                    |
|                                                       | 573             | Methanol   | 0.6±0.6                                                    |
|                                                       | 573             | 1-Propanol | 3.4±0.8                                                    |

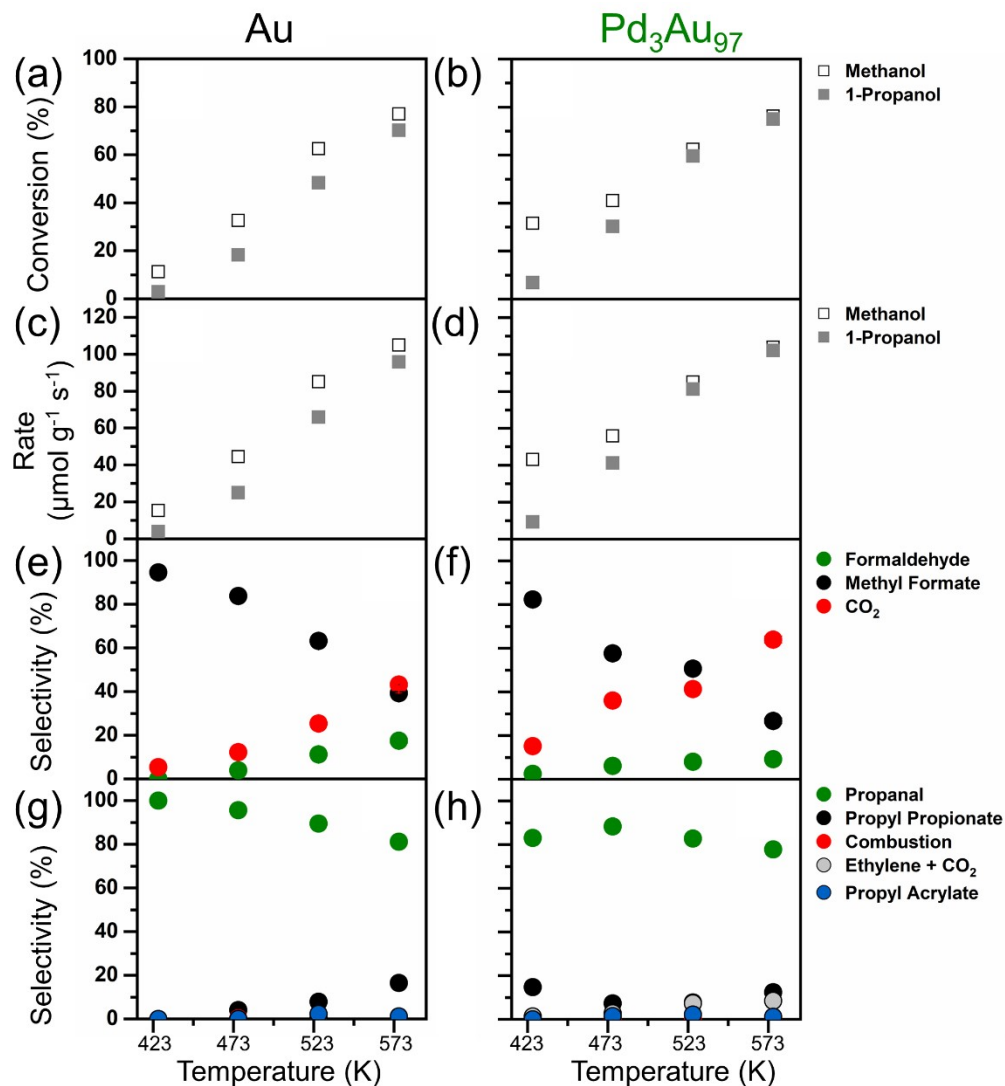

Figure S5. The conversion of methanol and 1-propanol and the rate of oxidation over the (a,c) Au and (b,d) Pd<sub>3</sub>Au<sub>97</sub> RCT-SiO<sub>2</sub> catalysts, and the corresponding selectivity over (e,g) Au and (f,h) Pd<sub>3</sub>Au<sub>97</sub> RCT-SiO<sub>2</sub> catalysts. Reaction conditions: 423 K ≤ Temperature ≤ 573 K, 4% methanol or 1-propanol, 10% O<sub>2</sub>, balanced in He; total flow rate = 50 mL/min; m<sub>cat</sub> = 10.0 mg for both Au and Pd<sub>3</sub>Au<sub>97</sub> RCT-SiO<sub>2</sub>.

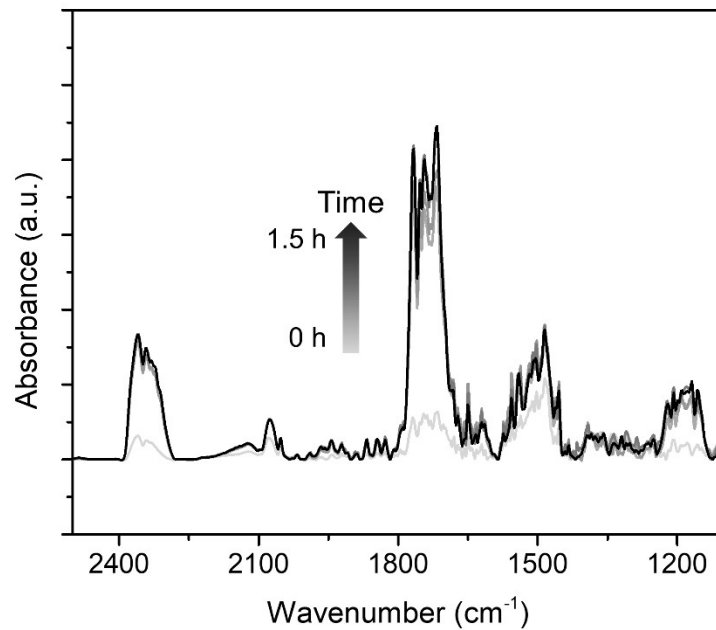

Figure S6. *In-situ* FTIR spectra in the 2500-1100 cm<sup>-1</sup> region collected as a function of time (0-1.5 h) during the oxidation of methanol over Pd<sub>3</sub>Au<sub>97</sub> RCT-SiO<sub>2</sub> at 423 K. Reaction conditions: 4% alcohol and 10% O<sub>2</sub>, balanced in He; total flow rate = 20 mL/min.

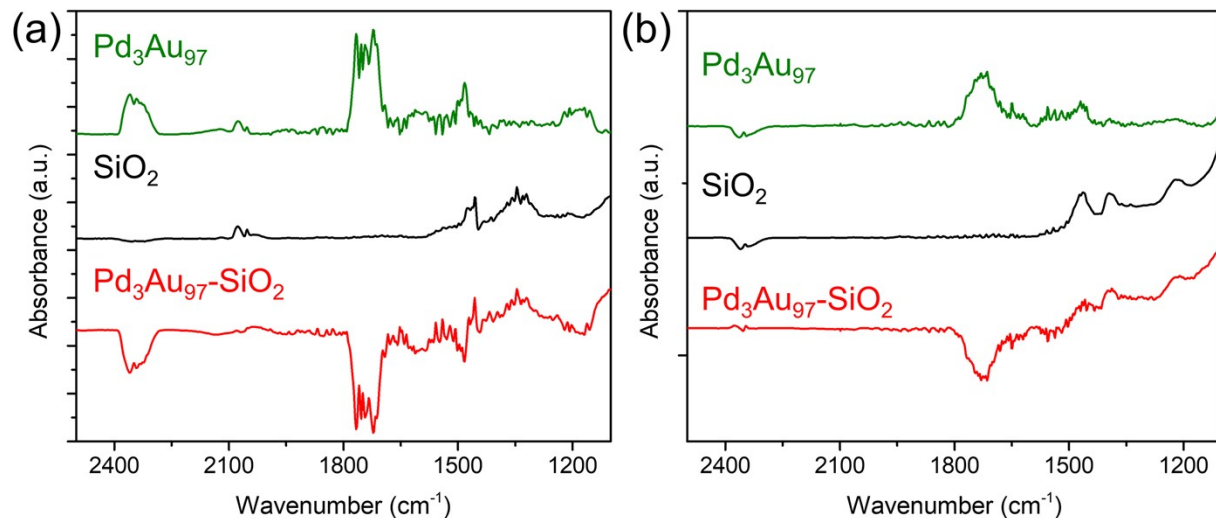

Figure S7. *In-situ* FTIR spectra in the 2500-1100 cm<sup>-1</sup> region of the difference (red) between steady-state spectra of species on Pd<sub>3</sub>Au<sub>97</sub> RCT-SiO<sub>2</sub> (green) and SiO<sub>2</sub> (black) formed during the oxidation of (a) methanol and (b) 1-propanol for 90 min. Downward features in the difference spectra (red) are contributions from the products. Reaction conditions: temperature = 423 K; 4% alcohol and 10% O<sub>2</sub>, balanced in He, total flow rate = 20 mL/min.

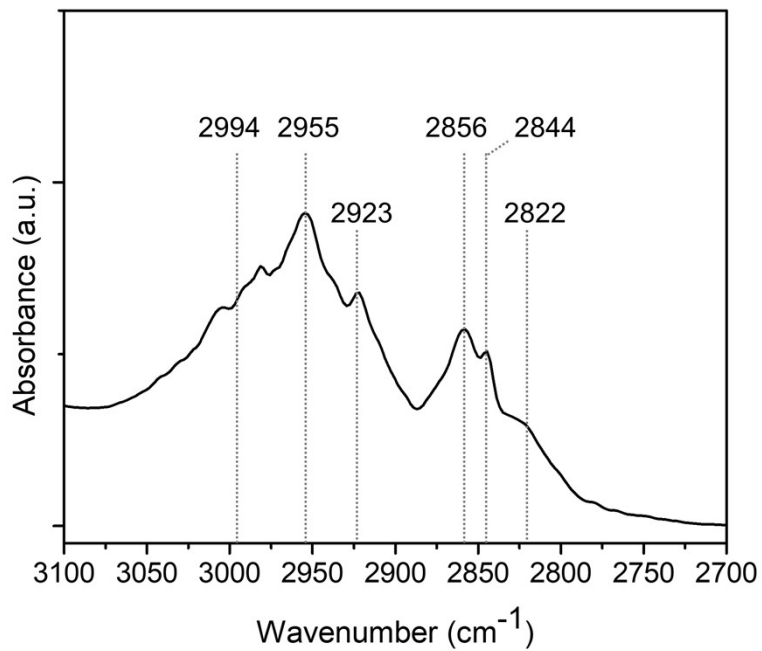

Figure S8. *In-situ* FTIR spectra in the C-H region (2700-3100 cm<sup>-1</sup>) of Pd<sub>3</sub>Au<sub>0.7</sub> RCT-SiO<sub>2</sub> under steady-state methanol oxidation reaction conditions. Dashed lines denoted IR peaks of interest. Reaction conditions: temperature = 423 K; 4% alcohol and 10% O<sub>2</sub>, balanced in He, total flow rate = 20 mL/min.

The accumulation of surface species on Pd<sub>3</sub>Au<sub>97</sub> RCT-SiO<sub>2</sub> under 1-propanol oxidation reaction was further confirmed using the integrated area in spectral region characteristic for C=O and C-O stretches (1900-1100 cm<sup>-1</sup>) collected as a function of time (Figure S9). The integrated area of *in-situ* FTIR spectra collected after methanol oxidation starts to decrease after purging in He at 423 K and reaches a minimum level after 2 h (Figure S9a), which indicates the desorption of both gas phase and surface-bound species. In contrast, purging in He after 1-propanol oxidation showed a close to zero decrease in the integrated area (Figure S9b), indicative of surface-bound species present even after purging in He for 2 h. These changes in the integrated area support the formation of strongly bound surface species poisoning Pd active sites under 1-propanol oxidation conditions, which resulted in minimal promotional effect of Pd<sub>3</sub>Au<sub>97</sub> RCT-SiO<sub>2</sub> towards C<sub>2</sub>-C<sub>4</sub> alcohols oxidation as observed in the reactor studies. *In-situ* FTIR spectra of alcohol oxidation over SiO<sub>2</sub> were also collected as a control to eliminate the contribution from molecules adsorbed on the support alone (Figure S9 black). Both integrated absorbance in the 1900-1100 cm<sup>-1</sup> region of *in-situ* FTIR spectra collected after methanol and 1-propanol oxidation showed continuous decrease in the integrated area after purging in He. This suggests the removal of gas species as no reaction will happen on the support SiO<sub>2</sub> itself.

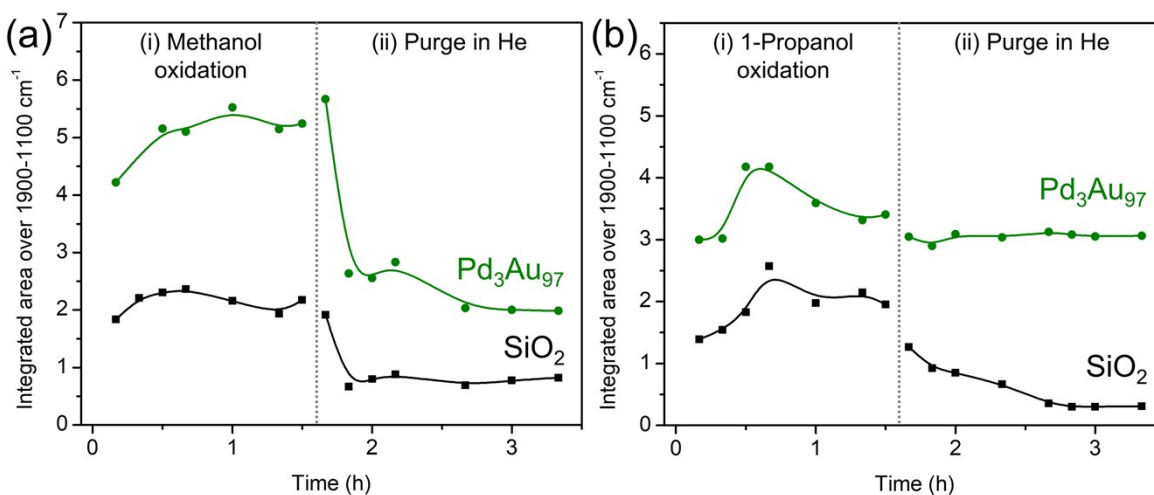

Figure S9. The integrated absorbance in the 1900-1100 cm<sup>-1</sup> region of *in-situ* FTIR spectra collected as a function of time during (i) the oxidation of (a) methanol and (b) 1-propanol over Pd<sub>3</sub>Au<sub>97</sub> RCT-SiO<sub>2</sub> (green) and SiO<sub>2</sub> support (black) for 1.5 h followed by (ii) purging in He for 2 h. Reaction conditions: temperature = 423 K; 4% alcohol and 10% O<sub>2</sub>, balanced in He, total flow rate = 20 mL/min.



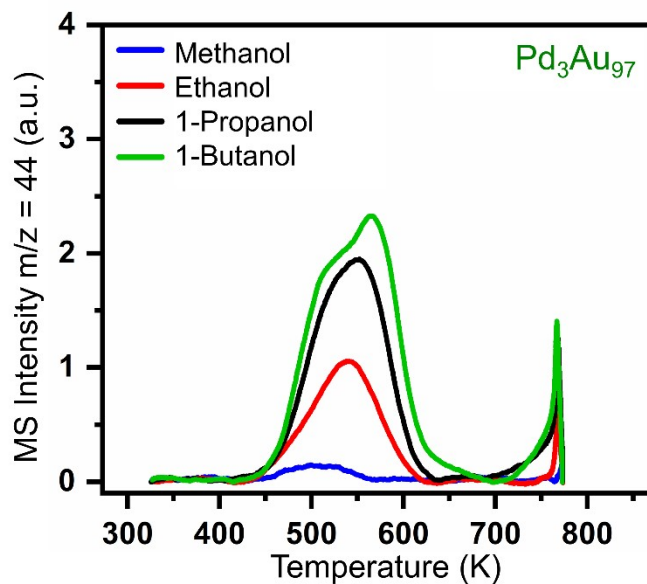

Figure S10. The production of CO<sub>2</sub> during the temperature programmed oxidation (TPO) between 298-773 K of used Pd<sub>3</sub>Au<sub>97</sub> RCT-SiO<sub>2</sub> catalysts after the oxidation of alcohols (C1-C4) for ~2 h at 423 K. TPO conditions: ramp rate = 10 K/min; 10% O<sub>2</sub> balanced in He; total flow rate = 20 mL/min; m<sub>cat</sub> = 40.5 mg.

Table S7. Temperature-programmed desorption temperature of carboxylates reported on Au(111) or Au(110) single crystal and the CO<sub>2</sub> formation peak temperature during the TPO of post-reaction Pd<sub>3</sub>Au<sub>97</sub> RCT-SiO<sub>2</sub> catalysts (corresponding to Figure S10).

| <b>Au(111) or Au(110) single crystal</b> |                        |                 | <b>Pd<sub>3</sub>Au<sub>97</sub> RCT-SiO<sub>2</sub></b> |                        |
|------------------------------------------|------------------------|-----------------|----------------------------------------------------------|------------------------|
| <b>Carboxylate</b>                       | <b>Temperature (K)</b> |                 | <b>Alcohol</b>                                           | <b>Temperature (K)</b> |
|                                          | <b>Limited O</b>       | <b>Excess O</b> |                                                          |                        |
| Formate <sup>3</sup>                     | 350                    | --              | Methanol                                                 | 493                    |
| Acetate <sup>4</sup>                     | 530                    | 425             | Ethanol                                                  | 548                    |
| Propionate <sup>5</sup>                  | 555                    | 410, 465        | 1-Propanol                                               | 553                    |
| Butyrate <sup>6</sup>                    | 530                    | --              | 1-Butanol                                                | 492, 563               |

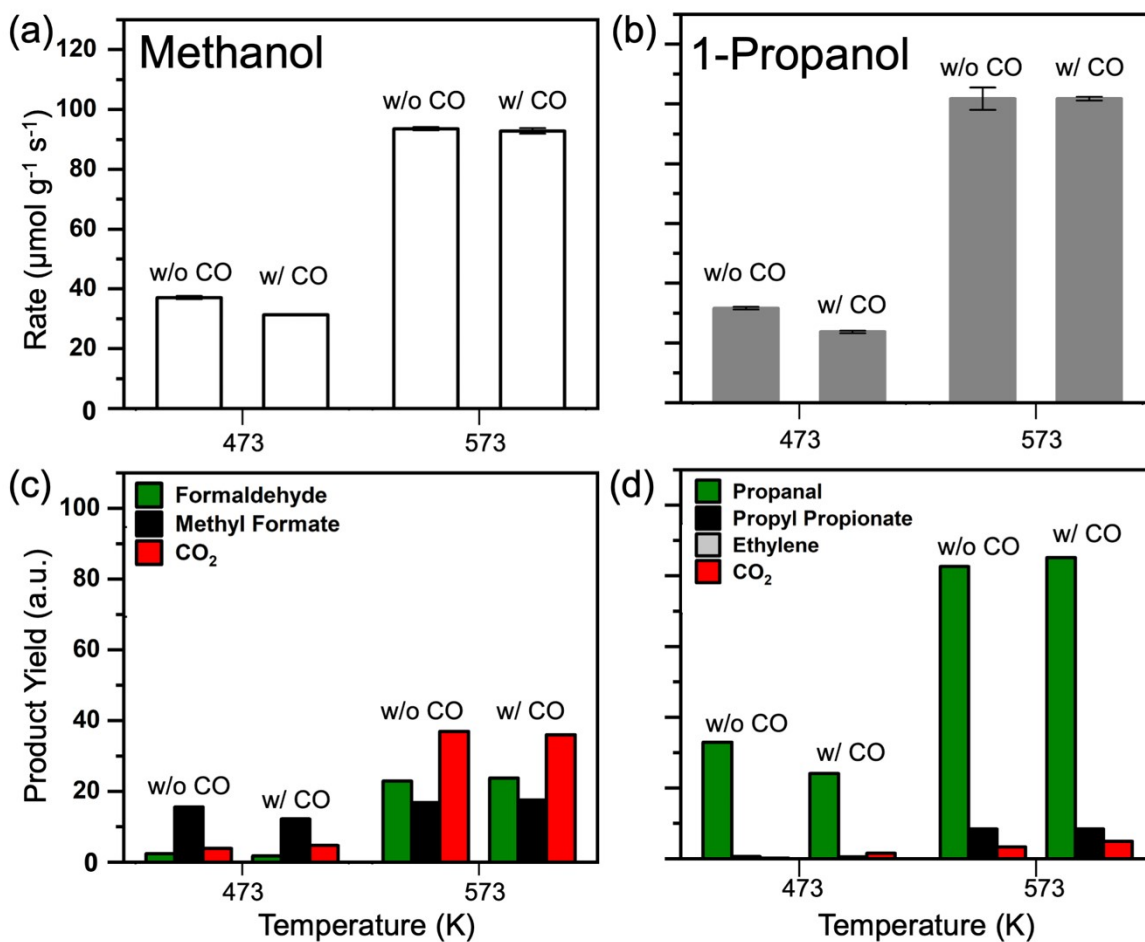

Figure S11. The rate of (a) methanol and (b) 1-propanol oxidation in the absence (w/o CO) and presence (w/ CO) of co-fed 2% CO at 473 K and 573 K over Au RCT-SiO<sub>2</sub>, and the corresponding yield of products during (c) methanol and (d) 1-propanol oxidation. Reaction conditions: 4% 1-propanol, 10% O<sub>2</sub>, 0 or 2% CO, balanced in He; total flow rate = 50 mL/min;  $m_{\text{cat}} = 10.0$  mg.

### Equations for conversion of alcohol and selectivity:

The previously described method for calculating the conversion of alcohol using reaction stoichiometry and quantifying products using a combined gas chromatograph-mass spectrometer<sup>7,8</sup> was used. A more detailed summary is provided here. The relative amount of molecule  $i$  ( $n_i$ ) is given by eq 1:

$$n_i = \frac{A_i}{\sigma_i} \quad (1)$$

where  $A_i$  is the area under the total ion current signal forming a peak generated by molecule  $i$  (arbitrary units), and  $\sigma_i$  is the total ionization cross section of molecule  $i$  ( $\text{\AA}^2$ ). The total ionization cross-section for all species is summarized in Table S8.

Table S8. Total ionization cross-section for molecules observed in the oxidation of alcohols

| molecule                  | $\sigma$ | ref.  | molecule          | $\sigma$ | ref. |
|---------------------------|----------|-------|-------------------|----------|------|
| CO <sub>2</sub>           | 3.5      | 9     | Propanal          | 9.7      | 10   |
| Formaldehyde <sup>a</sup> | 4.1      | 10,11 | 1-Propanol        | 10.15    | 10   |
| Methanol                  | 5.01     | 12    | Propyl Propionate | 18.36    | 12   |
| Methyl Formate            | 7.68     | 12    | Propyl Acrylate   | 16       | 10   |
| Acetaldehyde              | 6.7      | 10    | Propylene         | 8.82     | 13   |
| Ethyl Acetate             | 13.8     | 10    | Butanal           | 12.4     | 10   |
| Ethylene                  | 5.39     | 14    | 1-Butanol         | 12.85    | 10   |

<sup>a</sup>Estimated ionization cross-section using two sources.

The amount of carbon coming into the reactor was assumed to be the same as that coming out of the reactor, making eq 2 true.

$$n_{carbon} = N_{carbon, alcohol} \cdot n_{alcohol in} = \sum N_{carbon,i} \cdot n_i \quad (2)$$

where  $N_{carbon,i}$  is the number of carbons in molecule  $i$ ,

$n_i$  is the relative quantity of molecule  $i$  detected in the mass spectrometer,

$i$  is the index number of all reactants and products in the reactor effluent.

The general expression for conversion of an alcohol is given by eq 3.

$$X_{alcohol} = \frac{\sum_p N_{carbon,p} \cdot n_p}{\sum_i N_{carbon,i} \cdot n_i} \cdot 100\% \quad (3)$$

where  $p$  is the index number of the products in the reactor effluent.

The rate of alcohol consumed (eq 4) is readily calculated assuming the ideal gas law, using the reaction conditions and normalizing by the mass of catalyst in the bed.

$$Rate = \frac{X_{alcohol} \cdot P \cdot x_{alcohol\ inlet} \cdot F_{total\ inlet}}{R \cdot T \cdot m_{cat}} \cdot C_{const} \quad (4)$$

where  $X_{alcohol}$  is the conversion of alcohol (dimensionless),

$P$  is standard, atmospheric pressure (101,325 Pa),

$x_{alcohol\ inlet}$  is the inlet concentration of alcohol,

$F_{total\ inlet}$  is the total inlet flow rate (50 mL/min),

$R$  is the ideal gas constant (8.314 J/(mol\*K)),

$T$  is the standard temperature (298 K),

$m_{cat}$  is the mass of catalyst (g), and

$C_{const}$  is the product of constants to convert the  $Rate$  to units of  $\mu\text{mol g}_{cat}^{-1} \text{s}^{-1}$ .

Because at least an equimolar amount of CO<sub>2</sub> to the alkene product formed, this stoichiometry was accounted for when calculating the fractional selectivity associated with the oxidation of 1-propanol or 1-butanol. The amount of CO<sub>2</sub> associated with the combustion pathway (eq 5) is given by the different of the total amount of CO<sub>2</sub> formed and the stoichiometric amount of CO<sub>2</sub> formed from the alkene formed.

$$n'_{CO_2} = n_{CO_2} - \frac{1 \text{ mol } CO_2}{1 \text{ mol alkene}} \cdot n_{alkene} \quad (5)$$

The selectivity to methyl formate (eq 6), ethyl acetate (eq 7), propyl propionate (eq 8) and butanal (eq 9) are given explicitly to show the assumptions made regarding reaction stoichiometry for the oxidation of methanol, ethanol, 1-propanol, and 1-butanol. Note the units of the coefficients are not explicitly indicated in the equations so the variables are clear. The units for the coefficients are derived from the stoichiometric ratio between the alcohol and the product indicated in the variable  $n_p$ , where the subscript  $p$  is a carbon-containing product. Thus, all coefficients have units of moles of alcohol divided by moles of the product indicated.

$$S_{Methyl \ formate} = \frac{2 \cdot n_{Methyl \ formate}}{(2 \cdot n_{Methyl \ formate} + 1 \cdot n_{Formaldehyde} + 1 \cdot n_{CO_2})} \quad (6)$$

$$S_{Ethyl \ acetate} = \frac{2 \cdot n_{Ethyl \ acetate}}{(2 \cdot n_{Ethyl \ acetate} + 1 \cdot n_{Acetaldehyde} + 1/2 \cdot n_{CO_2})} \quad (7)$$

$$S_{Propyl \ propionate} = \frac{2 \cdot n_{Propyl \ propionate}}{(2 \cdot n_{Propyl \ propionate} + 2 \cdot n_{Propyl \ acrylate} + 1 \cdot n_{Pr}} \quad (8)$$

$$S_{\text{Butanal}} = \frac{1 \cdot n_{\text{Butanal}}}{\left(1 \cdot n_{\text{Butanal}} + \frac{1}{4} \cdot n'_{\text{CO}_2} + 1 \cdot n_{\text{Propylene}}\right)} \quad (9)$$

## References

- 1 C. Reece, E. A. Redekop, S. Karakalos, C. M. Friend and R. J. Madix, *Nat Catal*, 2018, **1**, 852–859.
- 2 B. Xu, X. Liu, J. Haubrich, R. J. Madix and C. M. Friend, *Angewandte Chemie International Edition*, 2009, **48**, 4206–4209.
- 3 C. R. O'Connor, F. Hiebel, W. Chen, E. Kaxiras, R. J. Madix and C. M. Friend, *Chem Sci*, 2018, **9**, 3759–3766.
- 4 C. G. F. Siler, T. Cremer, J. C. F. Rodriguez-Reyes, C. M. Friend and R. J. Madix, *ACS Catal*, 2014, **4**, 3281–3288.
- 5 C. R. O'Connor, Harvard University, 2020.
- 6 J. C. F. Rodriguez-Reyes, C. G. F. Siler, W. Liu, A. Tkatchenko, C. M. Friend and R. J. Madix, *J Am Chem Soc*, 2014, **136**, 13333–13340.
- 7 T. Shirman, J. Lattimer, M. Luneau, E. Shirman, C. Reece, M. Aizenberg, R. J. Madix, J. Aizenberg and C. M. Friend, *Chemistry - A European Journal*, 2018, **24**, 1743.
- 8 L.-C. Wang, K. J. Stowers, B. Zugic, M. M. Biener, J. Biener, C. M. Friend and R. J. Madix, *Catal. Sci. Technol.*, 2015, **5**, 1299–1306.
- 9 J. E. Hudson, C. Vallance and P. W. Harland, *Journal of Physics B: Atomic, Molecular and Optical Physics*, 2003, **37**, 445–455.
- 10 J. N. Bull, P. W. Harland and C. Vallance, 2012, 767–777.
- 11 Y. Xu, W. Chen, E. Kaxiras, C. M. Friend and R. J. Madix, *J Phys Chem B*, 2018, **122**, 555–560.
- 12 J. E. Hudson, Z. F. Weng, C. Vallance and P. W. Harland, *Int J Mass Spectrom*, 2006, **248**, 42–46.

- 13 H. Nishimura and H. Tawara, *J. Phys. B At. Mol. Opt. Phys.*, 1994, **27**, 2063–2074.
- 14 C. Tian and C. R. Vidal, *Chem Phys Lett*, 1998, **288**, 499–503.
